# Supplementary material
Source: HighWire-hosted journal article supplement (https://www.cmajopen.ca/highwire/filestream/89204/field_highwire_adjunct_files/0/open-2022-0149-1-at.pdf)
Supplement: open-2022-0149-1-at.pdf [file open-2022-0149-1-at.pdf]

Appendix: Unadjusted Odds Ratios for all the variables in the model

Admission to Intensive Care Unit

| Variables     | Unadjusted OR[95%CI] | P-Value |
|---------------|----------------------|---------|
| Md_count_grp2 | 1.16[0.83-1.62]      | 0.383   |
| Md_count_grp3 | 2.20[1.51-3.22]      | 0.000   |
| Cmg           |                      |         |
| 138           | 0.032[0.014-0.076]   | 0.000   |
| 139           | 0.048[0.024-0.098]   | 0.000   |
| 196           | 0.023[0.009-0.059]   | 0.000   |
| 254           | 0.010[0.003-0.032]   | 0.000   |
| 285           | 0.050[0.023-0.106]   | 0.000   |
| 436           | 0.013[0.004-0.037]   | 0.000   |
| 437           | 0.023[0.010-0.054]   | 0.000   |
| 477           | 0.025[0.010-0.065]   | 0.000   |
| 654           | 0.146[0.082-0.260]   | 0.000   |
| CCI           | 0.997[0.927-1.072]   | 0.927   |
| age admit     | 0.989[0.982- 0.997]  | 0.007   |
| Sex patient   | 1.172[0.874-1.572]   | 0.289   |
| LoS           | 1.054[1.039-1.069]   | 0.000   |
| Team senior   | 0.983[0.728-1.328]   | 0.911   |
| Team change   | 3.705[2.245-6.113]   | 0.000   |
| Handover      | 7.500[4.605-12.212]  | 0.000   |

In-patient mortality

| Variables     | Unadjusted OR[95%CI] | P-Value |
|---------------|----------------------|---------|
| Md_count_grp2 | 1.090[0.845-1.405]   | 0.510   |
| Md_count_grp3 | 1.917[1.455-2.525]   | 0.000   |
| Cmg           |                      |         |
| 138           | 0.189[0.109-0.327]   | 0.000   |
| 139           | 0.250[0.153-0.410]   | 0.000   |
| 196           | 0.315[0.193-0.513]   | 0.000   |
| 254           | 0.069[0.032-0.147]   | 0.000   |
| 285           | 0.390[0.254-0.597]   | 0.000   |
| 436           | 0.050[0.021-0.117]   | 0.000   |
| 437           | 0.009[0.003-0.033]   | 0.000   |
| 477           | 0.191[0.104-0.353]   | 0.000   |
| 654           | 0.317[0.202-0.500]   | 0.000   |
| CCI           | 1.479[1.346-1.626]   | 0.000   |
| age admit     | 1.051[1.041-1.061]   | 0.000   |
| Sex patient   | 1.153[0.920-1.445]   | 0.214   |
| LoS           | 1.009[1.004-1.016]   | 0.001   |
| Team senior   | 0.854[0.679-1.076]   | 0.181   |
| Team change   | 2.485[1.728-3.572]   | 0.000   |
| Handover      | 1.368[1.094-1.709]   | 0.006   |

Post-discharge 7-Day mortality rate

| Variables     | Unadjusted OR[95%CI] | P-Value |
|---------------|----------------------|---------|
| Md_count_grp2 | 1.061[0.817-1.379]   | 0.656   |
| Md_count_grp3 | 2.266[1.685-3.048]   | 0.000   |
| Cmg           |                      |         |
| 138           | 1.176[0.099-0.314]   | 0.000   |
| 139           | 0.259[0.156-0.429]   | 0.000   |
| 196           | 0.328[0.200-0.538]   | 0.000   |
| 254           | 0.059[0.255-0.626]   | 0.000   |
| 285           | 0.399[0.255-0.626]   | 0.000   |
| 436           | 0.053[0.023-0.123]   | 0.000   |
| 437           | 0.007[0.002-0.270]   | 0.000   |
| 477           | 0.191[0.104-0.352]   | 0.000   |
| 654           | 0.346[0.219-0.547]   | 0.000   |
| CCI           | 1.511[1.365-1.673]   | 0.000   |
| age admit     | 1.055[1.044-1.067]   | 0.000   |
| Sex patient   | 1.200[0.953-1.513]   | 0.121   |
| LoS           | 1.011[1.004-1.018]   | 0.001   |
| Team senior   | 0.850[0.671-1.076]   | 0.177   |
| Team change   | 2.776[1.891-4.076]   | 0.000   |
| Handover      | 1.408[1.122-1.766]   | 0.003   |

30 Day Mortality

| Variables     | Unadjusted OR[95%CI] | P-Value |
|---------------|----------------------|---------|
| Md_count_grp2 | 1.224[0.902-1.661]   | 0.194   |
| Md_count_grp3 | 3.409[2.309-5.032]   | 0.000   |
| Cmg           |                      |         |
| 138           | 0.114[0.056-0.229]   | 0.000   |
| 139           | 0.209[0.115-0.383]   | 0.000   |
| 196           | 0.309[0.171-0.561]   | 0.000   |
| 254           | 0.050[0.021-0.120]   | 0.000   |
| 285           | 0.406[0.232-0.711]   | 0.002   |
| 436           | 0.039[0.016-0.099]   | 0.000   |
| 437           | 0.006[0.002-0.020]   | 0.000   |
| 477           | 0.141[0.069-0.289]   | 0.000   |
| 654           | 0.299[0.171-0.526]   | 0.000   |
| CCI           | 1.819[1.569-2.088]   | 0.000   |
| age admit     | 1.070[1.057-1.085]   | 0.000   |
| Sex patient   | 1.216[0.930-1.589]   | 0.152   |
| LoS           | 1.017[1.007-1.027]   | 0.000   |
| Team senior   | 0.852[0.648-1.119]   | 0.249   |
| Team change   | 4.192[2.534-6.934]   | 0.000   |
| Handover      | 1.724[1.327-2.239]   | 0.000   |

### 7 Day Readmission

| Variables     | Unadjusted OR[95%CI] | P-Value |
|---------------|----------------------|---------|
| Md_count_grp2 | 1.123[0.866-1.455]   | 0.380   |
| Md_count_grp3 | 1.400[1.044-1.877]   | 0.024   |
| Cmg           |                      |         |
| 138           | 0.800[0.458-1.395]   | 0.431   |
| 139           | 0.909[0.529-1.564]   | 0.732   |
| 196           | 1.189[0.698-2.024]   | 0.523   |
| 254           | 0.557[0.299-1.039]   | 0.066   |
| 285           | 1.016[0.593-1.742]   | 0.953   |
| 436           | 0.622[0.340-1.137]   | 0.123   |
| 437           | 0.518[0.288-0.932]   | 0.028   |
| 477           | 1.675[0.968-2.898]   | 0.65    |
| 654           | 0.909[0.539-1.534]   | 0.721   |
| CCI           | 1.038[0.986-1.093]   | 0.156   |
| age admit     | 1.007[1.001-1.013]   | 0.023   |
| Sex patient   | 1.109[0.885-1.389]   | 0.370   |
| LoS           | 1.004[1.001-1.008]   | 0.013   |
| Team senior   | 1.398[1.089-1.795]   | 0.009   |
| Team change   | 1.505[1.034-2.190]   | 0.033   |
| Handover      | 1.126[0.886-1.230]   | 0.333   |

### 30 Day Readmission

| Variables     | Unadjusted OR[95%CI] | P-Value |
|---------------|----------------------|---------|
| Md_count_grp2 | 1.144[0.943-1.387]   | 0.171   |
| Md_count_grp3 | 1.455[1.166-1.815]   | 0.001   |
| Cmg           |                      |         |
| 138           | 0.919[0.592-1.429]   | 0.710   |
| 139           | 1.240[0.812-1.893]   | 0.319   |
| 196           | 1.913[1.254-2.918]   | 0.003   |
| 254           | 1.082[0.682-1.716]   | 0.739   |
| 285           | 1.739[1.133-2.267]   | 0.011   |
| 436           | 1.044[0.664-1.641]   | 0.852   |
| 437           | 0.689[0.442-1.075]   | 0.101   |
| 477           | 1.970[1.251-3.103]   | 0.003   |
| 654           | 1.191[0.784-1.808]   | 0.412   |
| CCI           | 1.070[1.028-1.115]   | 0.001   |
| age admit     | 1.007[1.002-1.02]    | 0.003   |
| Sex patient   | 1.101[0.925-1.310]   | 0.278   |
| LoS           | 1.002[0.998-1.005]   | 0.350   |
| Team senior   | 1.204[0.999-1.450]   | 0.050   |
| Team change   | 1.174[0.859-1.605]   | 0.313   |
| Handover      | 1.035[0.866-1.237]   | 0.38    |
